# Supplementary material for: ELF5 Suppresses Estrogen Sensitivity and Underpins the Acquisition of Antiestrogen Resistance in Luminal Breast Cancer
Source: PubMed Central journal article supplement (PMC3531499; doi:10.1371/journal.pbio.1001461), 2012-12-27

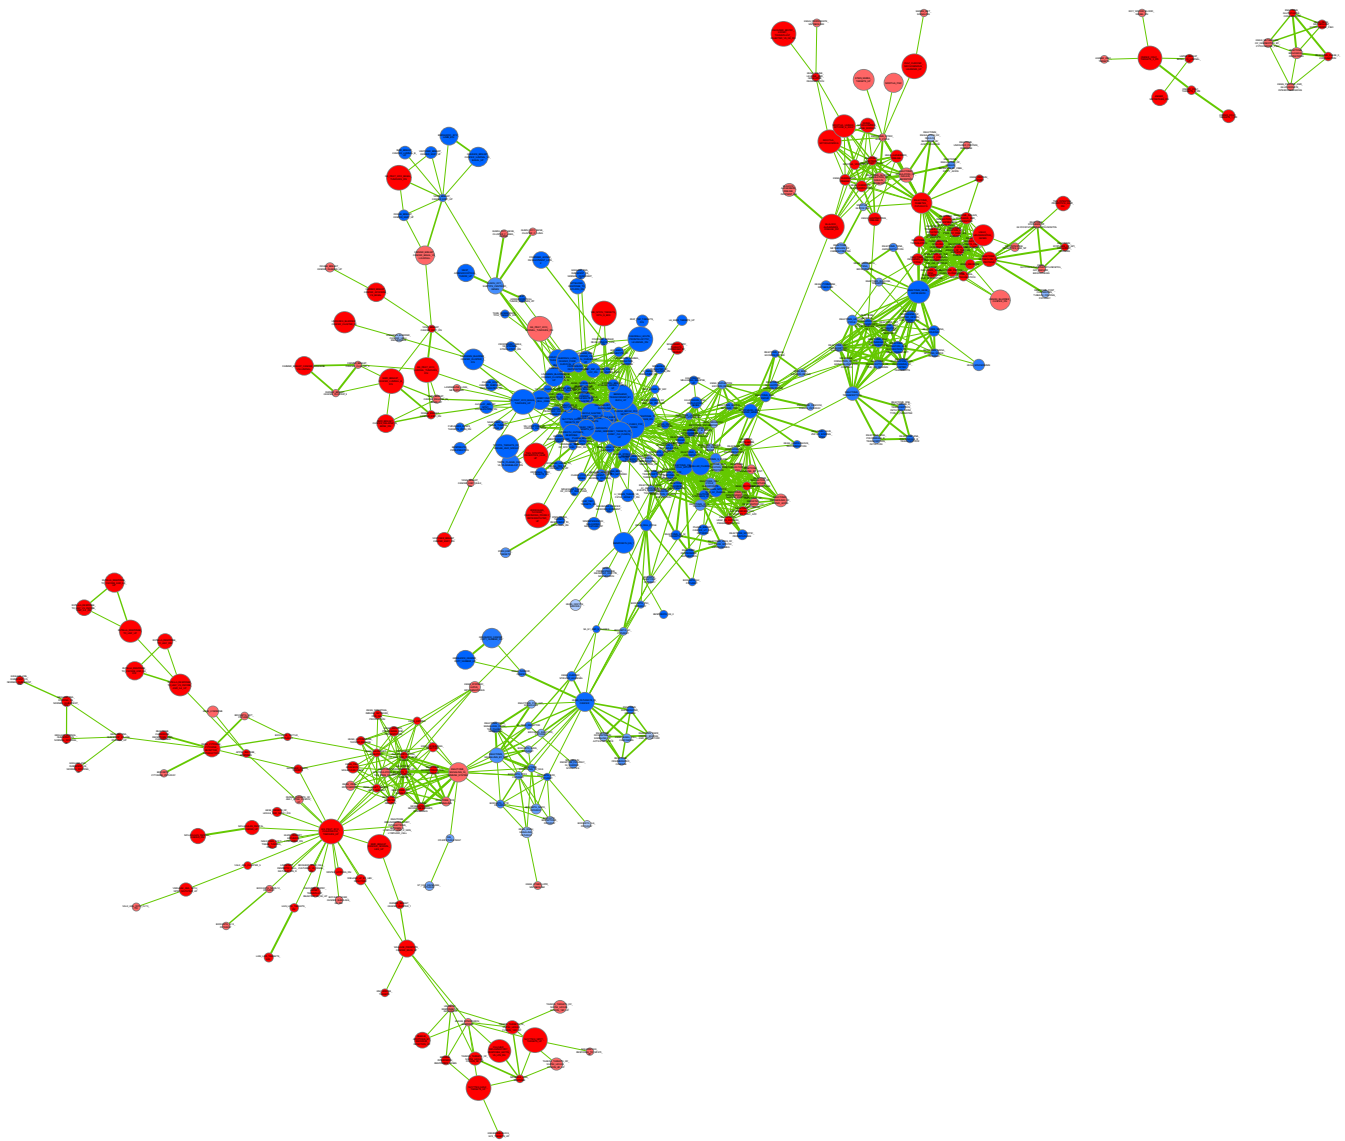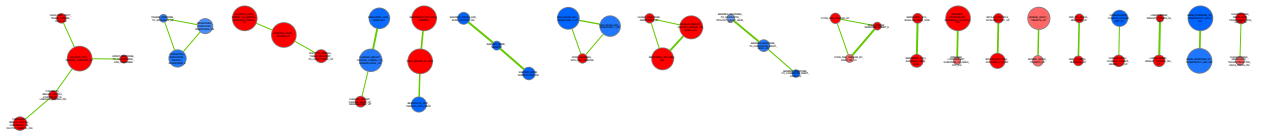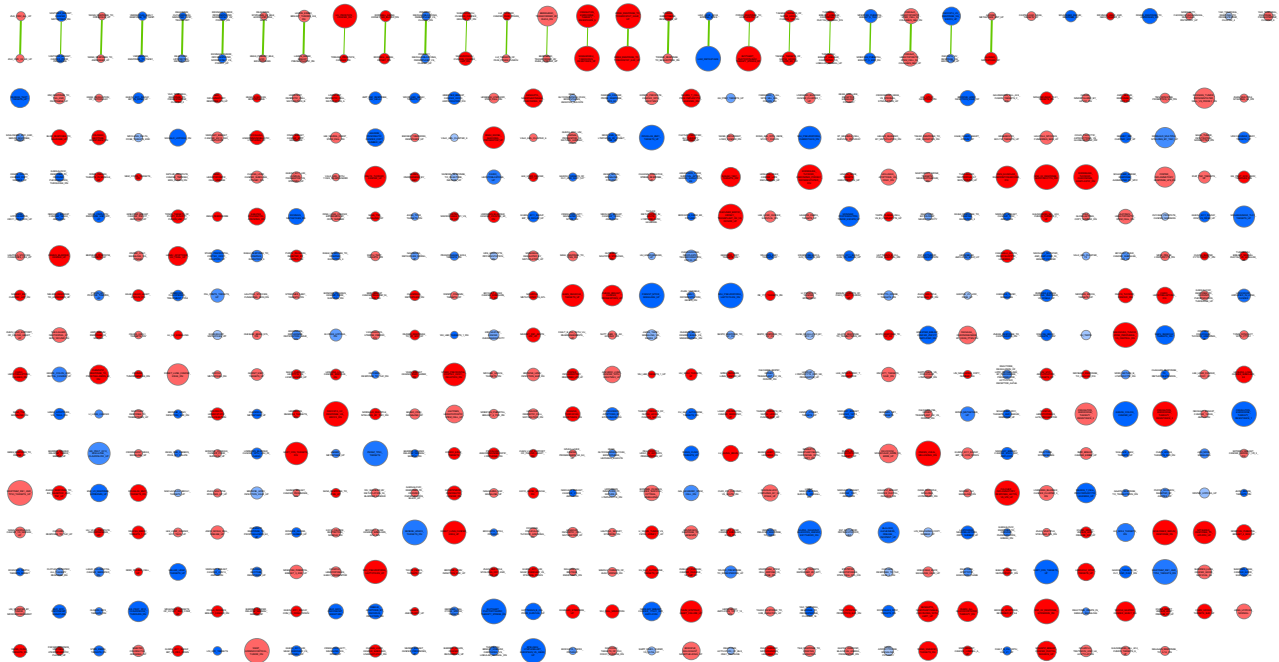

Supplement: pbio.1001461.s011.pdf [file pbio.1001461.s011.pdf]
